# Supplementary material for: Evaluation of a Quasi-steady state approximation of the cloud Droplet Growth Equation (QDGE) scheme for aerosol activation in global models using multiple aircraft data over both continental and marine environments
Source: Copernicus journal article supplement (doi:10.5194/gmd-2021-148), 2021-08-09
Supplement: Supplementary file [file gmd-2021-148-AC2-supplement.pdf]

1 **Response to Referee #1 (Dr. Steven J. Ghan):**

2

3 Thanks for the careful review and instructive comments. We have revised the paper  
4 carefully based on the reviewer's comments. This is described as follows (*italic text in*  
5 *blue color is from the reviewer*).

6

7 **Comments:**

8 *This study uses in situ measurements of aerosol, updraft velocity, and droplet number*  
9 *to evaluate a new method for estimating cloud droplet number concentration. In*  
10 *addition to quantifying the mean relative error (MRE), it isolates contributions to that*  
11 *error from uncertainty in various inputs. This is a valuable contribution that is*  
12 *presented clearly, is reproducible, and of high quality.*

13 *However, its conclusions would be much stronger if it added, as it suggests at the end,*  
14 *a comparison with the performance without the quasi-steady state approximation*  
15 *(QSSA), i.e., using a rising parcel model with the same inputs. Without such a*  
16 *comparison, it is difficult to draw conclusions about the contribution of the QSSA to*  
17 *the MRE.*

18 .

19 **Response:**

20 We greatly appreciate the reviewer's comments. The reviewer affirmed the value of  
21 our work and put forward the constructive suggestion, that is, comparing the results of  
22 the QDGE scheme with the parcel model to reinforce our conclusions.

23 In the revised version, we examine the performance of the QDGE scheme by  
24 comparing it with parcel model results by conducting a series of experiments as  
25 described in Ghan et al., (2011). Considering different assumed aerosol types, the  
26 biases of simulated maximum supersaturations to the parcel model (i.e. the  
27 benchmark) are all below 0.18 %, showing that the QDGE scheme performs decently.

28 Under the above premise, we carried out the closure experiments and analyzed the  
29 contributions of the QDGE to the *MRE*. The above simulations and comparison with  
30 the parcel model are included in Sect. 2.2 of the revised paper.
